# Supplementary material for: Weekly versus triweekly cisplatin plus intensity-modulated radiotherapy in locally advanced nasopharyngeal carcinoma: A propensity score analysis with a large cohort
Source: PubMed Central journal article supplement — J Cancer. 2018 Sep 8;9(19):3447–55. doi: 10.7150/jca.26110 (PMC6171032; doi:10.7150/jca.26110), 2018-09-08
Supplement: jcav09p3447s1.pdf [file jcav09p3447s1.pdf]

**Supplementary Table 1** Univariate analysis in the unmatched group

| Variable         | Disease-free survival |           |              | Distant metastasis-free survival |           |                  | Loco-regional relapse-free survival |           |          | Overall survival |           |              |
|------------------|-----------------------|-----------|--------------|----------------------------------|-----------|------------------|-------------------------------------|-----------|----------|------------------|-----------|--------------|
|                  | HR                    | CI (%)    | <i>P</i>     | HR                               | CI (%)    | <i>P</i>         | HR                                  | CI (%)    | <i>P</i> | HR               | CI (%)    | <i>P</i>     |
| Sex              |                       |           |              |                                  |           |                  |                                     |           |          |                  |           |              |
| Female           | Ref.                  | Ref.      |              | Ref.                             | Ref.      |                  | Ref.                                | Ref.      |          | Ref.             | Ref.      |              |
| Male             | 1.13                  | 0.74–1.71 | 0.573        | 1.77                             | 0.90–3.49 | 0.098            | 1.87                                | 0.92–3.81 | 0.084    | 1.08             | 0.63–1.87 | 0.777        |
| Age              |                       |           |              |                                  |           |                  |                                     |           |          |                  |           |              |
| ≤45              | Ref.                  | Ref.      |              | Ref.                             | Ref.      |                  | Ref.                                | Ref.      |          | Ref.             | Ref.      |              |
| >45              | 1.02                  | 0.72–1.45 | 0.923        | 0.75                             | 0.45–1.25 | 0.271            | 1.37                                | 0.82–2.30 | 0.227    | 2.22             | 1.36–3.61 | <b>0.001</b> |
| KPS              |                       |           |              |                                  |           |                  |                                     |           |          |                  |           |              |
| 70–80            | Ref.                  | Ref.      |              | Ref.                             | Ref.      |                  | Ref.                                | Ref.      |          | Ref.             | Ref.      |              |
| 90–100           | 0.41                  | 0.15–1.09 | 0.073        | 0.26                             | 0.08–0.84 | <b>0.024</b>     | 0.74                                | 0.10–5.37 | 0.769    | 0.29             | 0.09–0.91 | <b>0.033</b> |
| T classification |                       |           |              |                                  |           |                  |                                     |           |          |                  |           |              |
| T1–2             | Ref.                  | Ref.      |              | Ref.                             | Ref.      |                  | Ref.                                | Ref.      |          | Ref.             | Ref.      |              |
| T3               | 0.91                  | 0.53–1.56 | 0.727        | 0.58                             | 0.29–1.19 | 0.137            | 1.07                                | 0.48–2.38 | 0.873    | 0.62             | 0.33–1.19 | 0.149        |
| T4               | 1.47                  | 0.80–2.71 | 0.214        | 1.54                             | 0.71–3.30 | 0.273            | 1.31                                | 0.51–3.38 | 0.578    | 1.34             | 0.65–2.76 | 0.427        |
| N classification |                       |           |              |                                  |           |                  |                                     |           |          |                  |           |              |
| N0–1             | Ref.                  | Ref.      |              | Ref.                             | Ref.      |                  | Ref.                                | Ref.      |          | Ref.             | Ref.      |              |
| N2–3             | 1.24                  | 0.87–1.76 | 0.238        | 1.97                             | 1.18–3.26 | <b>0.009</b>     | 1.29                                | 0.77–2.15 | 0.340    | 1.68             | 1.05–2.67 | <b>0.030</b> |
| Clinical stage   |                       |           |              |                                  |           |                  |                                     |           |          |                  |           |              |
| III              | Ref.                  | Ref.      |              | Ref.                             | Ref.      |                  | Ref.                                | Ref.      |          | Ref.             | Ref.      |              |
| IV               | 1.61                  | 1.10–2.37 | <b>0.015</b> | 2.81                             | 1.69–4.67 | <b>&lt;0.001</b> | 1.00                                | 0.53–1.89 | 0.999    | 2.25             | 1.39–3.64 | <b>0.001</b> |
| Treatment        |                       |           |              |                                  |           |                  |                                     |           |          |                  |           |              |
| Triweekly        | Ref.                  | Ref.      |              | Ref.                             | Ref.      |                  | Ref.                                | Ref.      |          | Ref.             | Ref.      |              |
| Weekly           | 0.68                  | 0.43–1.06 | 0.085        | 0.44                             | 0.21–0.92 | <b>0.029</b>     | 0.99                                | 0.55–1.78 | 0.962    | 1.04             | 0.61–1.75 | 0.892        |

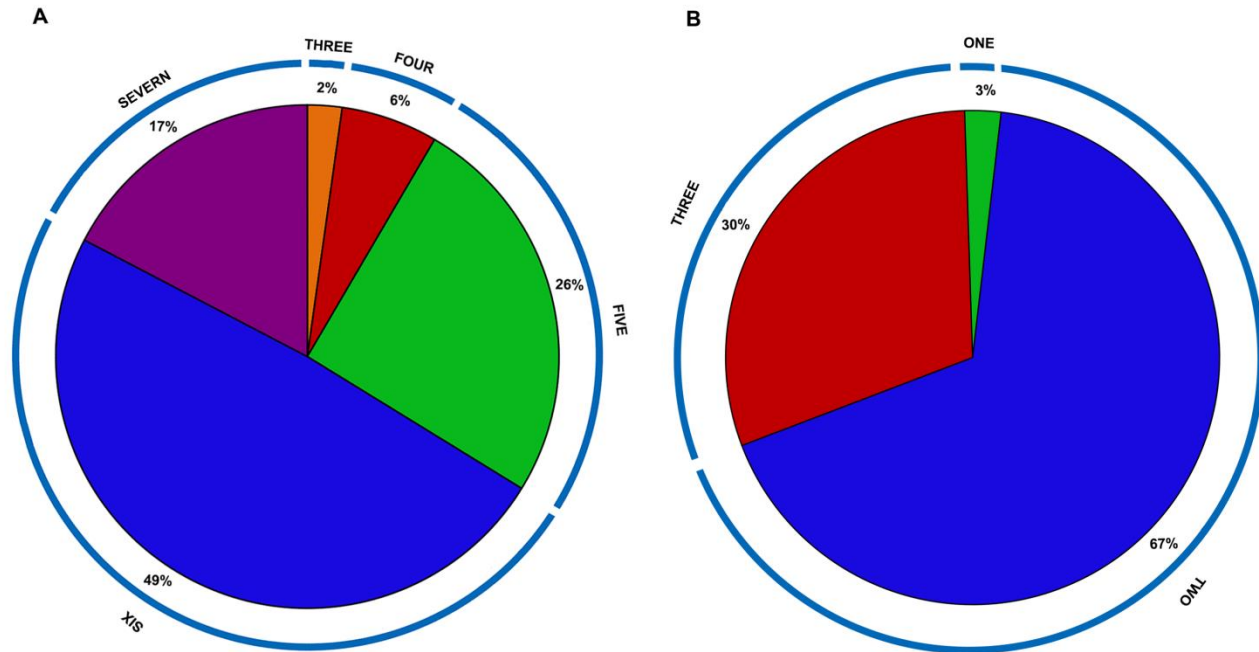

**Supplementary Figure 1: Compliance of concurrent cisplatin chemotherapy in the well-balanced cohort. (A) Weekly regimen. (B) Triweekly regimen.**
